# Supplementary material
Source: publisher site journal article supplement (https://www.dovepress.com/get_supplementary_file.php?f=235673.docx)
Supplement: Supplementary file 1 [file get_supplementary_file.php]

**Increased von Willebrand factor processing in COPD, reflecting lung epithelium damage, is associated with emphysema, exacerbations and elevated mortality risk**

Lasse L. Langholm1,2, Sarah Rank Rønnow1,3, Jannie M. B. Sand1, Diana Julie Leeming1, Ruth Tal-Singer4*, Bruce E. Miller4*, Jørgen Vestbo5*, Morten A. Karsdal1 andTina Manon-Jensen1

*The Evaluation of COPD Longitudinally to Identify Surrogate Endpoints (ECLIPSE) study investigators

1Nordic Bioscience A/S, Herlev, Denmark, 2University of Copenhagen, Faculty of Health and Medical Sciences, Department of Biomedical Sciences, Copenhagen, Denmark, 3University of Southern Denmark, The Faculty of Health Science, Odense, Denmark, 4Respiratory Medical Innovation, Value Evidence & Outcomes, GSK R&D, Collegeville, PA, USA, 5Division of Infection, Immunity and Respiratory Medicine, University of Manchester, and Manchester University NHS Foundation Trust, UK

**Supplementary**

**Table 1. Ethics and review boards**

| **Inv/Site No.** | **Institution & Address** | **IEC/IRB Committee** |
| --- | --- | --- |
| 027904/023622 | Asthma Centre  Ivan Vazov Street Nr 31  PO Box 1018  Pleven, 5800 Bulgaria | Ethics Committee for Multicentre Trials  8, Damyan Gruev str.,  Sofia 1303  Bulgaria |
| 076209/023623 | Military Medical Academy  Georgi Sofiiski 3 str  Sofia 1606 Bulgaria | Ethics Committee for Multicentre Trials  8, Damyan Gruev str.,  Sofia 1303  Bulgaria |
| 006269/023794 | Montreal Chest Institute  3650 St-Urbain, Room K307  Montreal, QC H2X 2P4 Canada | McGill University Health Center  Research Ethics Board  3650 St Urbain  Montreal, QC H2X 2P4 |
| 006610/023668 | The Lung Center  2775 Laurel St., 7th Floor  Vancouver, BC V5Z 1M9 Canada | The University of British Columbia  Office of Research Services Clinical Research Ethics Board  Room210, 828 West 10th Ave  Vancouver, BC V5Z 1L8 Canada |
| 004970/023483 | Queen Elizabeth II Health Sciences Centre  Halifax Infirmary  1796 Summer St., Room 5452  Halifax, NS B3H 3A7 Canada | **Capital Health Research Ethics Board** Centre for Clinical Research Building  118-5790 University Avenue  Halifax, NS B3H 1V7 Canada |
| 029347/023796 | McMaster University, Health Sciences Center  1200 Main St. West, Room 3U25  Hamilton, ON L8N 3Z5 Canada | Hamilton Health Sciences/Faculty of Health Sciences Research Ethics Board  293 Wellington St N, Suite 102 Hamilton, Ontario L8L 8E7 Canada |
| 035031/023795 | Pacific Lung Health Center  1081 Burrard Street  8B Providence Wing  Vancouver, BC V6Z 1Y6 Canada | **Office of Research Services (ORS)**  Providence Health Care Research Institute  Room 1125, 11th Floor  1190 Hornby Street c/o 1081 Burrard Street Vancouver, BC V6Z 1Y6 |
| 006193/023547 | Hopital Laval, Recherche Clinic  Centre de Pneumologie  2725 Chemin Sainte Foy  Pavillion U, Locale U 1751  Sainte Foy, QC G1V 4G5 Canada | Comité d’éthique de la recherche  Institut Universitaire de Cardiologie et de Pneumologie de Québec (IUCPQ)  2725, chemin Ste-Foy  Quebec, Qc  Canada  G1V 4G5 |
| 004395/02409 4 | Kingston General Hospital  Richardson House  102 Stuart Street  Kingtson, ON K7L 2V6 Canada | Queens University  Office of Research Services  Fleming Hall, Jemmett Wing, Room 301  Queens University  Kingston, ON, Canada |
| 000309/024204 | SPLiN s.r.o.  Oddeleni TRN  Cimicka 37/446  Praha 8 18200 Czech Republic | Multicentric Ethics Committee Fakultni nemocnice v Motole  V Uvalu 84 Prague 5 ZIP: 150 06  Czech Republic |
| 000683/023960 | H:S Hvidovre Hospital  Hjerte-Lungemedicinsk afdeling  Kettegaard Alle 30  Opgang 1  Hvidovre 2650 Denmark | Den videnskabsetiske komité for region hovedstaden  Regionsgaarden  Kongensvænge 2  3400 Hillerød |
| 001687/024403 | Astmacentrum Hornerheide  Hornerheide 1  Horn 6085 NM Netherlands | METC Zuidwest-Holland  M.H.H.A. Kirkels-Breukers  P.O Box 5011  2600 GA Delft  The Netherlands |

| 082272/023579 | | Haukeland Universitets sykehus  Chest department  Jonas Liesvei 65  Bergen N 5021 Norway | | | Regional Ethic Committee West  Haukeland University Hospital, N-5021 Bergen, Norway | | |
| --- | --- | --- | --- | --- | --- | --- | --- |
| 014566/024144 | | P3 Research Bown Hospital  Churchill Drive Crofton Downs  Wellington 6035 New Zealand | | | c/- Ministry of Health 1-3 The Terrace Level 1 Wellington 6011 | | |
| 136098/024146 | | KOPA Golnik  Golnik 36  4204 Golnik Slovenia | | | The National Medical Ethics Committee of the Republic of Slovenia  University Institute of Clinical Neurophysiology, Medical Center Ljubljana,  Zaloška c. 7, SI-1525 Ljubljana | | |
| 108244/026658 | | Hospital Son Dureta  C/ Andrea Doria 55  Palma de Mallorca 07014 Spain | | | Comité ètic d´investigació clínica Illes Balears  Conselleria de Salut i Consum Direcció General d'Avaluació i Acreditació Comitè Ètic d'Investigació Clínica de les Illes Balears (CEIC-IB) Camí de Jesús, 38 A 07011 Palma - Illes Balears | | |
| 000473/023973 | | Aintree University Hospitals NHS Foundation Trust  Respiratory Research Department  Longmoor Lane, Ward 14a  Liverpool L9 7AL United Kingdom | | | Oxfordshire REC C  2nd Floor, Astral House  Chaucer Business Park  Granville Way  Bicester OX26 4JT | | |
| 082424/023706 | | Cambridge Institute for Medical Research  Department of Medicine  Hills Road, Wellcome Trust / MRC Building  Cambridge CB2 2XY United Kingdom | | | Oxfordshire REC C  2nd Floor, Astral House  Chaucer Business Park  Granville Way  Bicester OX26 4JT | | |
| 029855/023707 | | New Royal Infirmary of Edinburgh  Little France Crescent, Old Dalkeith Road  51 Little France Crescent  Edinburgh Midlothian EH16 4SA  United Kingdom | | | Oxfordshire REC C  2nd Floor, Astral House  Chaucer Business Park  Granville Way  Bicester OX26 4JT | | |
| 023731/023974 | | Wythenshawe Hospital  Medicine Evaluation Unit  Southmoor Road  The Langley Building, North West Lung Research Centre  Manchester M23 9LT United Kingdom | | | Oxfordshire REC C  2nd Floor, Astral House  Chaucer Business Park  Granville Way  Bicester OX26 4JT | | |
| 029742/024037 | | The Royal Free Hospital  Academic Unit of Respiratory Medicine  Pond Street  London NW3 2QG United Kingdom | | | Oxfordshire REC C  2nd Floor, Astral House  Chaucer Business Park  Granville Way  Bicester OX26 4JT | | |
| 001069/024393 | | Institute of Phthisiatry and Pulmonology  Department of Pulmonology  10, Amosova Str  Kiev 03680 Ukraine | | |  | | |
| 001047/024392 | | Institute of Phthisiatry and Pulmonology  Department of Pulmonology  10, Amosova Str  Kiev 03680 Ukraine | | |  | | |
| 001071/024362 | | Institute of Phthisiatry and Pulmonology  Department of Pulmonology  10, Amosova Str  Kiev 03680 Ukraine | | |  | | |
| 001063/024364 | | Donetsk State Medical University  Department of Therapy  16 Illicha prospect  Donetsk 83003 Ukraine | | |  | |
| 044783/023140 | | University of Texas Health Science Center  Pulmonary Diseases  7400 Merton Minter Blvd., (111E)  San Antonio, TX 78229 United States | | | University of Texas Health Science Center  7703 Floyd Curl Drive, Mail Code 7830  San Antonio, TX 78229-3900 | |
| 077534/023146 | | Rhode Island Hospital  Division of Pulmonary, Sleep & Critical Care Medicine  593 Eddy Street, APC 7th Floor  Providence, RI 02903 United States | | | Lifespan Office of Research Administration  167 Point Street  Providence, RI 02903 | |
| 013075/023147 | | Los Angeles Biomedical Research Institute at Harbor-UCLA Medical Center  Rehab Clinical Trials Center  1124 W. Carson St., Bldg. J4  Torrance, CA 90502 United States | | John F. Wolf, MD Human Subjects Committee  Los Angeles Biomedical Research Institute at Harbor-UCLA Medical Center  1124 West Carson Street  Torrance, CA 90502 | | |
| 008578/023354. | | St. Elizabeth’s Medical Center  Pulmonary STN-3  736 Cambridge Street  Boston, MA 02135 Unites States | | Research/Human Subjects Committee  Caritas St. Elizabeth's Medical Center Cambridge St., HOQ3 Boston, MA 02135 | | |
| 021992/023148 | | Pulmonary Associates of Richmond, Inc.  1000 Boulders Parkway, Suite 201  Richmond, VA 23225 United States | | Goodwyn Institution Review Board  9380 Main Street  Cincinnati, OH 45242 | | |
| 010875/023149 | | Pulmonary Associates, PA  1112 East McDowell Road  Phoenix, AZ 85006 United States | | Goodwyn Institution Review Board  9380 Main Street  Cincinnati, OH 45242 | | |
| 011553/023150 | | Advances in Medicine  42362 Bob Hope Drive  Rancho Mirage, CA 92270 Unites States | | Western International Review Board  3535 Seventh Ave SW  Olympia, WA 98508 | | |
| 010094/023355 | | Baylor Clinic-Baylor College of Medicine  6620 Main Street  Suite 11B, 16  Houston, TX 77030 United States | | Baylor College of Medicine IRB  Clinical Research Studies  One Baylor Plaza, Mail stop 600D  Houston, TX 77030 | |
| 015497/023356 | | Dartmouth-Hitchcock Medical Center  Pulmonary & Critical Care Center  One Medical Center Drive  Lebanon, NH 03756 Unites States | | Dartmouth-Hitchcock Medical Center  Committee for the Protection of Human Subjects  11 Rope Ferry Road #6210  Hanover, NH 03755 | |
| 008005/023357 | | National Jewish Medical & Research Center  Weinberg Clinical Research Unit  1400 Jackson Street  Denver, CO 80206 United States | | National Jewish Medical & Research Center IRB  1400 Jackson Street  Denver, CO 80206 | |
| 009021/023358 | | University of Nebraska Medical Center  Pulmonary Clinical Studies Unit  982465 Nebraska Medical Center  DRC II1022  Omaha, NE 68198 United States | | University of Nebraska Medical Center IRB  Academic & Research Services Bldg. 3000  987830 Nebraska Medical Center  Omaha, NE 68198 | |
| 083482/023571 | | Yale University School of Medicine  Internal Medicine/Pulmonary  1 Gilbert Street, TAC S 441  New Haven, CT 06520 United States | | Yale University School of Medicine  Human Investigation Committee  47 College Street, Suite 204  New Haven, CT 06520 | |
| 015449/023359 | | Mayo Clinic  Pulmonary Clinical Research Center  Lanmark 2-46  14 – 2nd Street SW  Rochester, MN 55905 United States | | Mayo Foundation IRB  201 Building, Room 4-60 200 First Street SW Rochester, MN 55905 | |
| 080801/023389 | | Creighton University Medical Center  Pulmonary & Critical Care Division  601 N. 30th Street, Suite 3820  Omaha, NE 68131 United States | | | Creighton University Medical Center IRB  2500 California Plaza  Omaha, NE 68178 |
| 010532/023489 | | University of Pittsburgh Medical Center  Emphysema Research Center  3471 5th Ave., Suite 1211  Pittsburgh, PA 15213 United States | | University of Pittsburgh IRB  3500 Fifth Ave, Ground Level  Pittsburgh, PA 15213 | | |

| 021093/023390 | Houston VA Medical Center  2002 Holcombe Blvd.  Pulmonary 111-1, Room 3C-220  Houston, TX 77030 United States | Baylor College of Medicine IRB  Clinical Research Studies  One Baylor Plaza, Mail stop 600D  Houston, TX 77030 |
| --- | --- | --- |
| 008864/023392 | Midwest Chest Consultants, PC  330 First Capital Drive, Suite 470  St. Charles, MO 63301 United States | Goodwyn Institution Review Board  9380 Main Street  Cincinnati, OH 45242 |
| 077533/023391 | Harvard University–Brigham & Women’s Hospital  Channing Laboratory  181 Longwood Ave.  Boston, MA 02115 United States | Brigham & Women’s Hospital IRB  Partners Human Research Office  116 Huntington Ave, Suite 1002  Boston, MA 02116 |
| 016586/023393 | University of Miami School of Medicine  1600 NW 10th Ave, #7064-A (R-47)  Miami, FL 33136 | Western International Review Board  3535 Seventh Ave SW  Olympia, WA 98508 |
| 057745/023394 | Johns Hopkins Asthma & Allergy Center  5501 Hopkins Bayview Circle, Room 3B-58  Baltimore, MD 21224 United States | John Hopkins School of Medicine  Office of Human Subject Research  1620 McElderry St., Reed Hall  Suite B 130  Baltimore, MD 21205 |
| 012252/023395 | St. Francis Hospital & Medical Center  Pulmonary Medicine  114 Woodland Street  Hartford, CT 06105 United States | St. Francis Hospital & Medical Center IRB  Department of Research  114 Woodland St.  Hartford, CT 06105 |
